# Supplementary material for: Sulfur-loaded monodisperse carbon nanocapsules anchored on graphene nanosheets as cathodes for high performance lithium–sulfur batteries
Source: Royal Society of Chemistry journal article supplement (doi:10.1039/c6ta08557a), 2016-10-31
Supplement: c6ta08557a1.pdf [file c6ta08557a1.pdf]

## Supporting Information

### **Sulfur-loaded Monodisperse Carbon Nanocapsules Anchored on Graphene Nanosheet as Cathode for High Performance Lithium-Sulfur Batteries †**

Seung-Keun Park,<sup>‡a,b</sup> Jeongyeon Lee,<sup>‡a</sup> Taejin Hwang,<sup>a</sup> Yuanzhe Piao<sup>\*a,b</sup>

<sup>a</sup>Program in Nano Science and Technology, Graduate School of Convergence Science and Technology, Seoul National University, 145 Gwanggyo-ro, Yeongtong-gu, Suwon-si, Gyeonggi-do, 443-270, Republic of Korea.

Fax: +82-31-8889148; Tel: +82-31-8889141; E-mail: parkat9@snu.ac.kr

<sup>b</sup>Advanced Institutes of Convergence Technology, 145 Gwanggyo-ro, Yeongtong-gu, Suwon-si, Gyeonggi-do, 443-270, Republic of Korea.

† These authors contributed equally to this work

## Figures

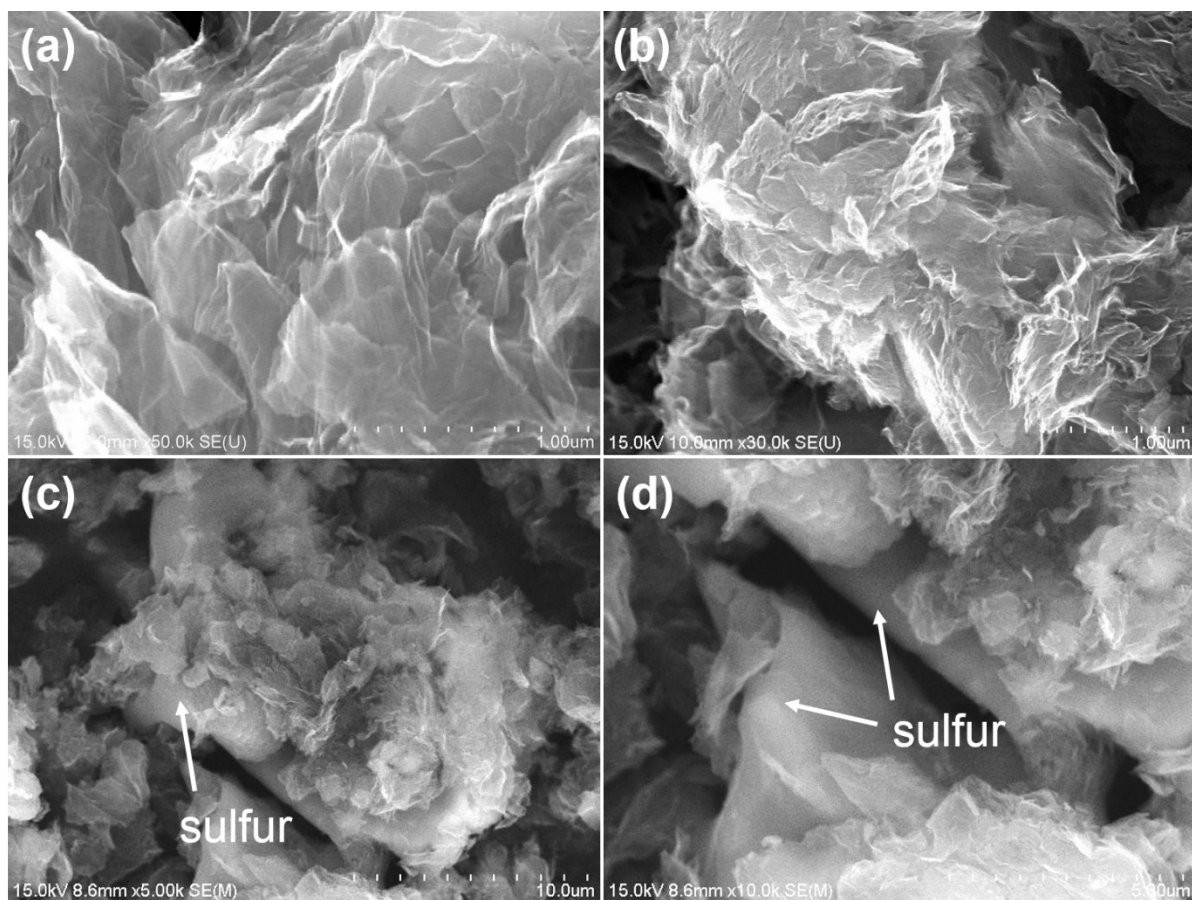

**Fig. S1** SEM images of (a, b) bare graphene nanosheets and (c, d) graphene/sulphur composite

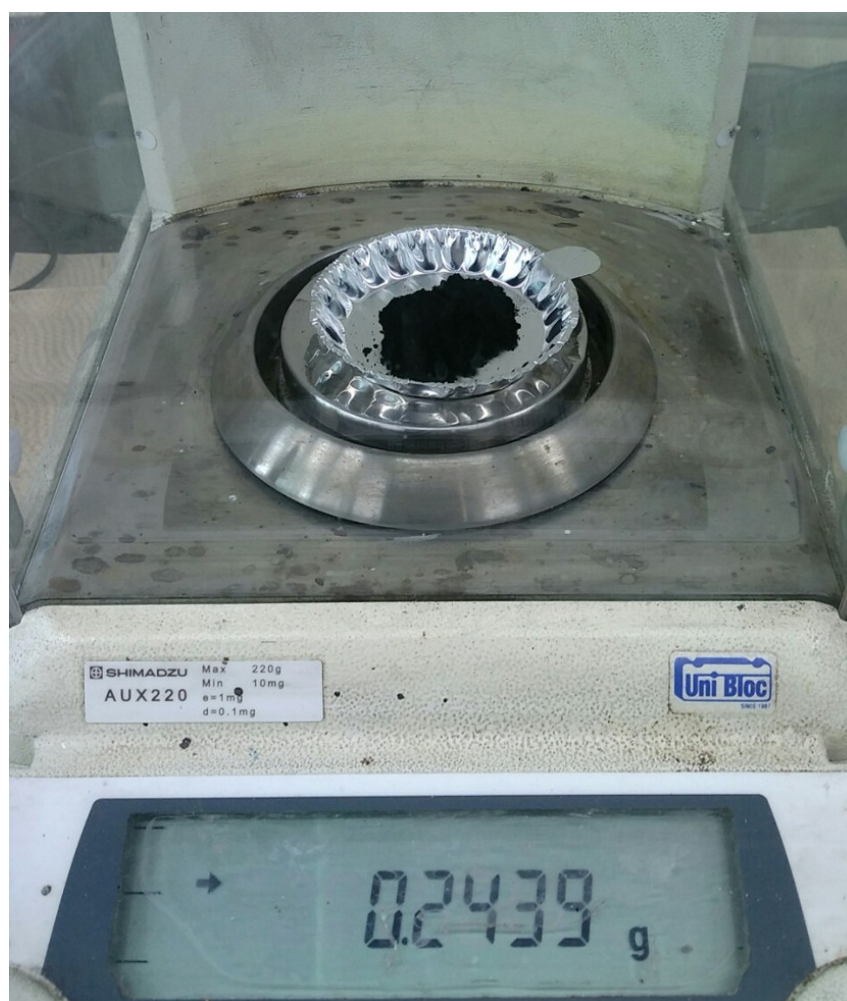

**Fig. S2** Large scale synthesis of MCNC/G composites (using 0.15 g of graphene)

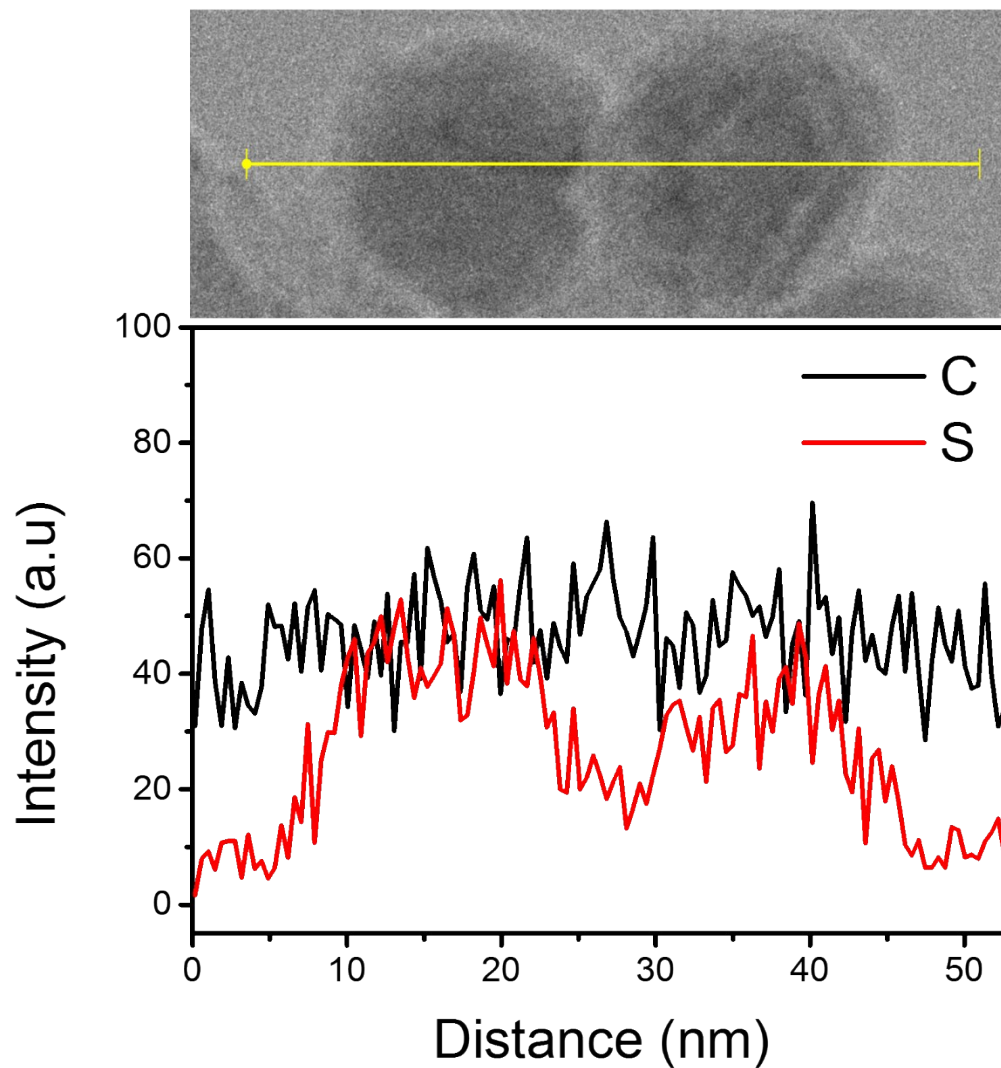

**Fig. S3** HR-TEM images of the S element confined carbon nanocapsules and the corresponding EDX line-scanning profiles along the yellow line.

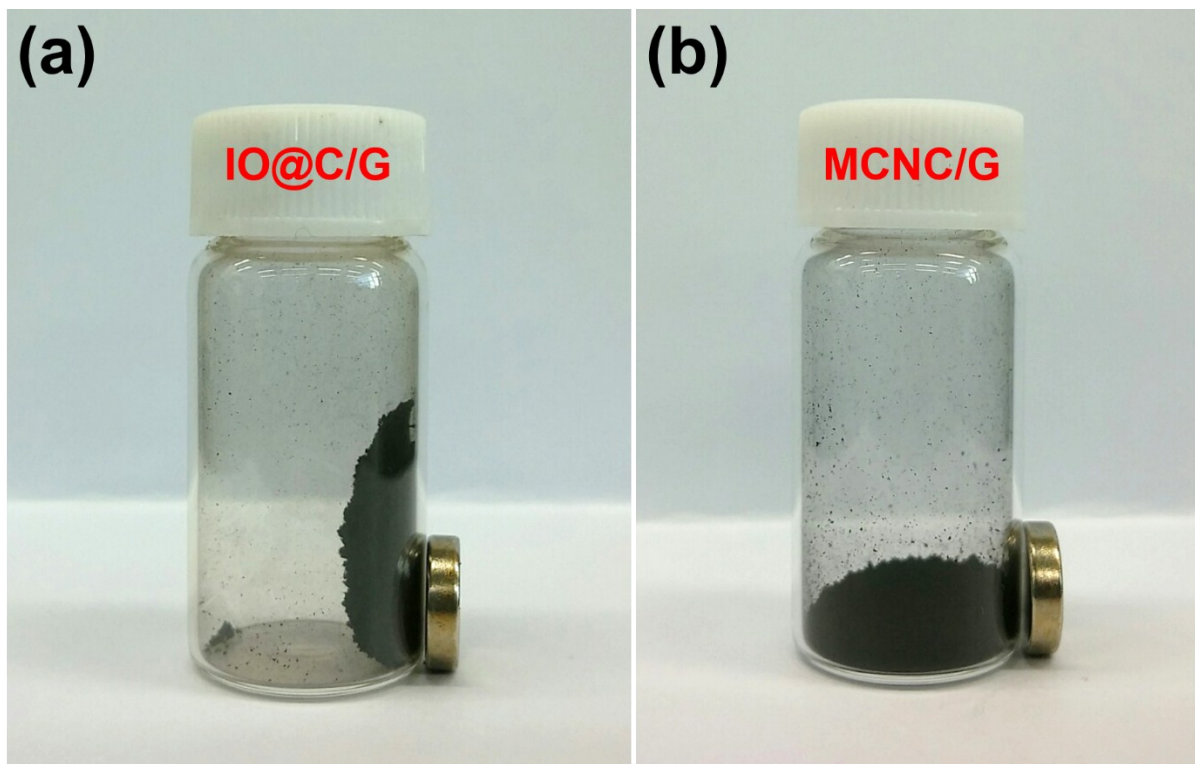

**Fig. S4** Pictures in (a, b) show that powder of MCNC/G was not attracted by a magnet after acid etching of IO@C/G

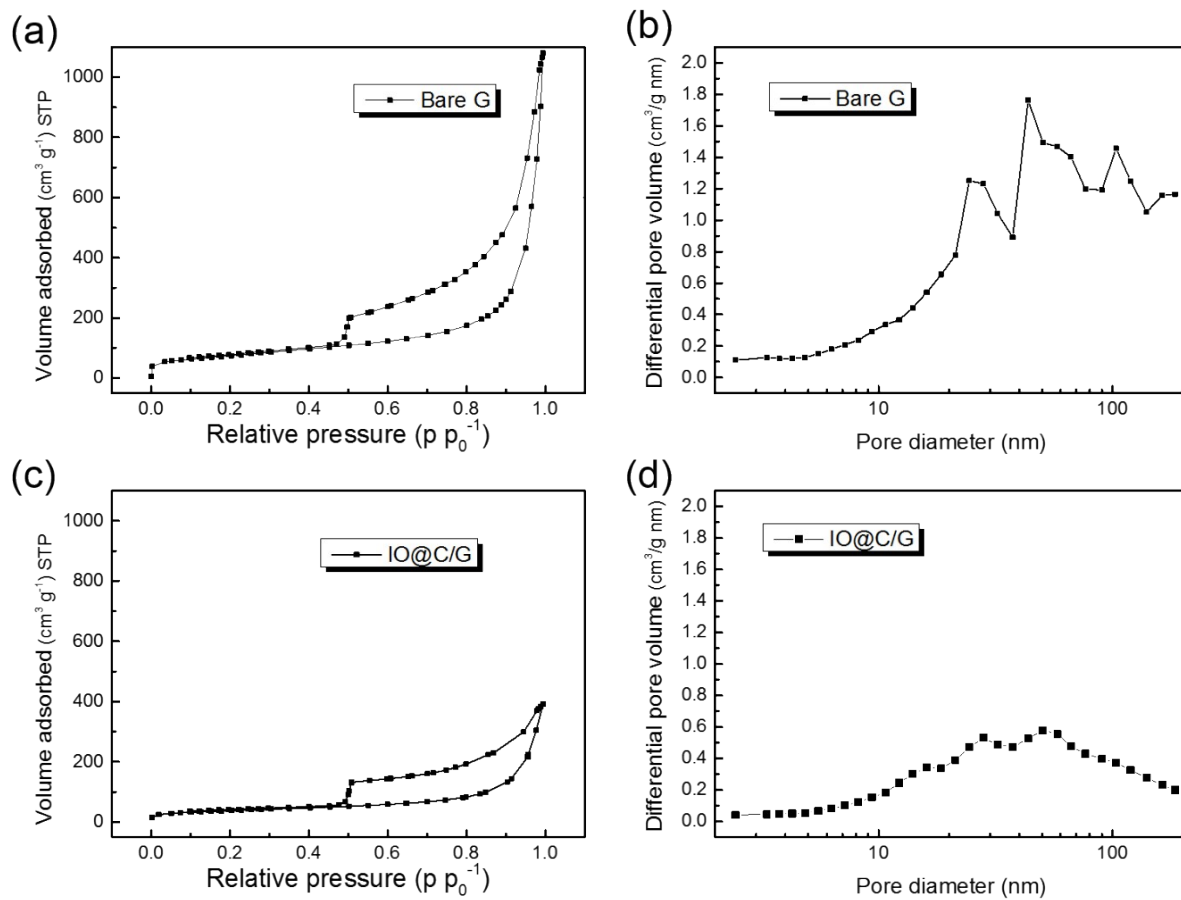

**Fig. S5** (a, c) The N<sub>2</sub>-sorption isotherms and (b, d) the pore size distribution curves of bare graphene nanosheets and IO@C/G, respectively.

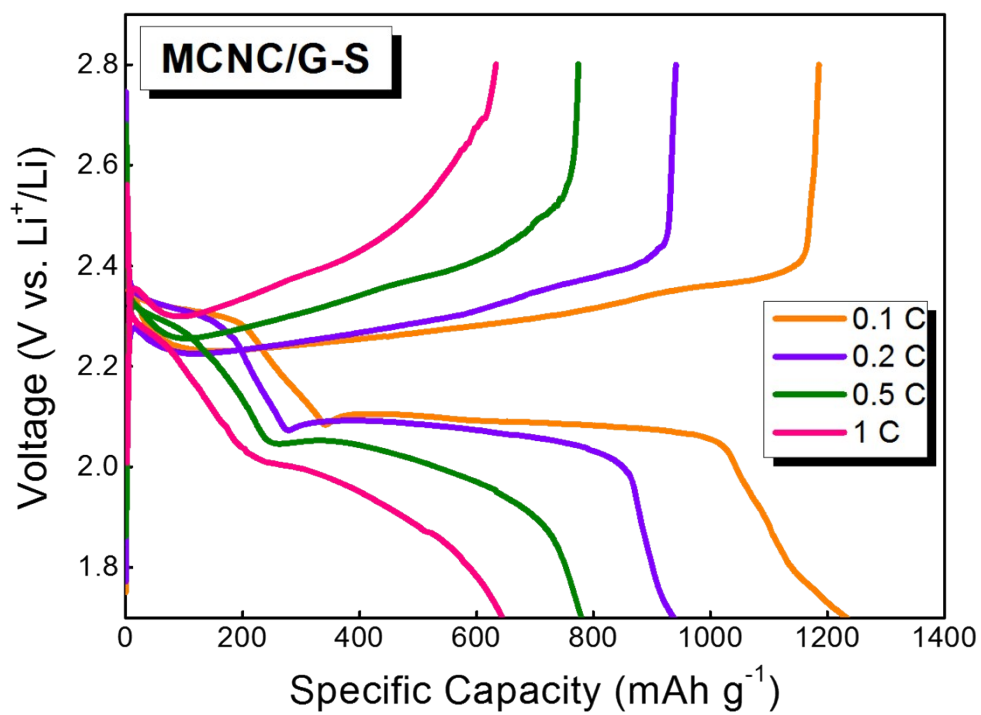

**Fig. S6** Charge/discharge profiles of MCNC/G-S at various C-rates.

**Table S1.** Li-sulfur batteries properties of various carbon-based cathode materials.

| Materials                                                  | Voltage Range      | Current Rate                   | Specific Capacity             | Cycle Number | Ref              |
|------------------------------------------------------------|--------------------|--------------------------------|-------------------------------|--------------|------------------|
| <b>MCNC/G-S</b>                                            | <b>1.7 - 2.8 V</b> | <b>0.5 C</b>                   | <b>525 mAh g<sup>-1</sup></b> | <b>100</b>   | <b>This work</b> |
| Double-shelled Co(OH) <sub>2</sub> /LDH nanocages          | 1.7 - 2.8 V        | 0.5C                           | 491 mAh g <sup>-1</sup>       | 100          | S1               |
| Hierarchical micro/mesoporous carbonaceous nanotube        | 1.4 - 2.8 V        | 500 mA g <sup>-1</sup> (~0.3C) | 618.5 mAh g <sup>-1</sup>     | 100          | S2               |
| Hollow indented carbon spheres                             | 1.7 - 2.8 V        | 0.5 C                          | ~ 650 mAh g <sup>-1</sup>     | 100          | S3               |
| Partially unzipped multi-walled CNTs                       | 1.7 - 2.8 V        | 0.2 C                          | 707.2 mAh g <sup>-1</sup>     | 60           | S4               |
| Porous carbon modified with SnO <sub>2</sub> nanoparticles | 1.8 - 3 V          | 0.5 C                          | 530 mAh g <sup>-1</sup>       | 50           | S5               |
| Hierarchical porous honeycomb carbon                       | 1.8 - 2.7 V        | 0.5 C                          | 603 mAh g <sup>-1</sup>       | 100          | S6               |

- S1. J. Zhang, H. Hu, Z. Li and X. W. Lou, *Angew. Chem. Int. Ed.*, 2016, **55**, 3982-3986.
- S2. K. Mi, Y. Jiang, J. Feng, Y. Qian and S. Xiong, *Adv. Funct. Mater.*, 2016, **26**, 1571-1579.
- S3. Y. Zhong, S. Wang, Y. Sha, M. Liu, R. Cai, L. Li and Z. Shao, *J. Mater. Chem. A*, 2016, **4**, 9526-9535.
- S4. Y. C. Jeong, K. Lee, T. Kim, J. H. Kim, J. Park, Y. S. Cho, S. J. Yang and C. R. Park, *J. Mater. Chem. A*, 2016, **4**, 819-826.
- S5. J. Zhang, Y. Cai, Q. Zhong, D. Lai and J. Yao, *Nanoscale*, 2015, **7**, 17791-17797.
- S6. Y. H. Qu, Z. A. Zhang, X. H. Zhang, G. D. Ren, X. W. Wang, Y. Q. Lai, Y. X. Liu and J. Li, *Electrochim. Acta*, 2014, **137**, 439-446.
